# Supplementary material
Source: PubMed Central journal article supplement (PMC3685286)
Supplement: supp_2012.064659_2012.064659.ONNEBO_SUPPL.pdf [file supp_2012.064659_2012.064659.ONNEBO_SUPPL.pdf]

## Alternative *TEL-JAK2* fusions associated with T-cell acute lymphoblastic leukemia and atypical chronic myelogenous leukemia dissected in zebrafish

Sara M. N. Onnebo,<sup>1\*</sup> Parisa Rasighaemi,<sup>2\*</sup> Janani Kumar,<sup>2</sup> Clifford Liongue,<sup>2</sup> and Alister C. Ward<sup>2</sup>

<sup>1</sup>School of Life & Environmental Sciences, Deakin University, Burwood, Victoria; <sup>2</sup>School of Medicine, and Strategic Research Centre in Molecular and Medical Research, Deakin University, Geelong, Victoria, Australia

Citation: Onnebo SMN, Rasighaemi P, Kumar J, Liongue C, and Ward AC. Alternative *TEL-JAK2* fusions associated with T-cell acute lymphoblastic leukemia and atypical chronic myelogenous leukemia dissected in zebrafish. *Haematologica* 2012;97(12):1895-1903. doi:10.3324/haematol.2012.064659

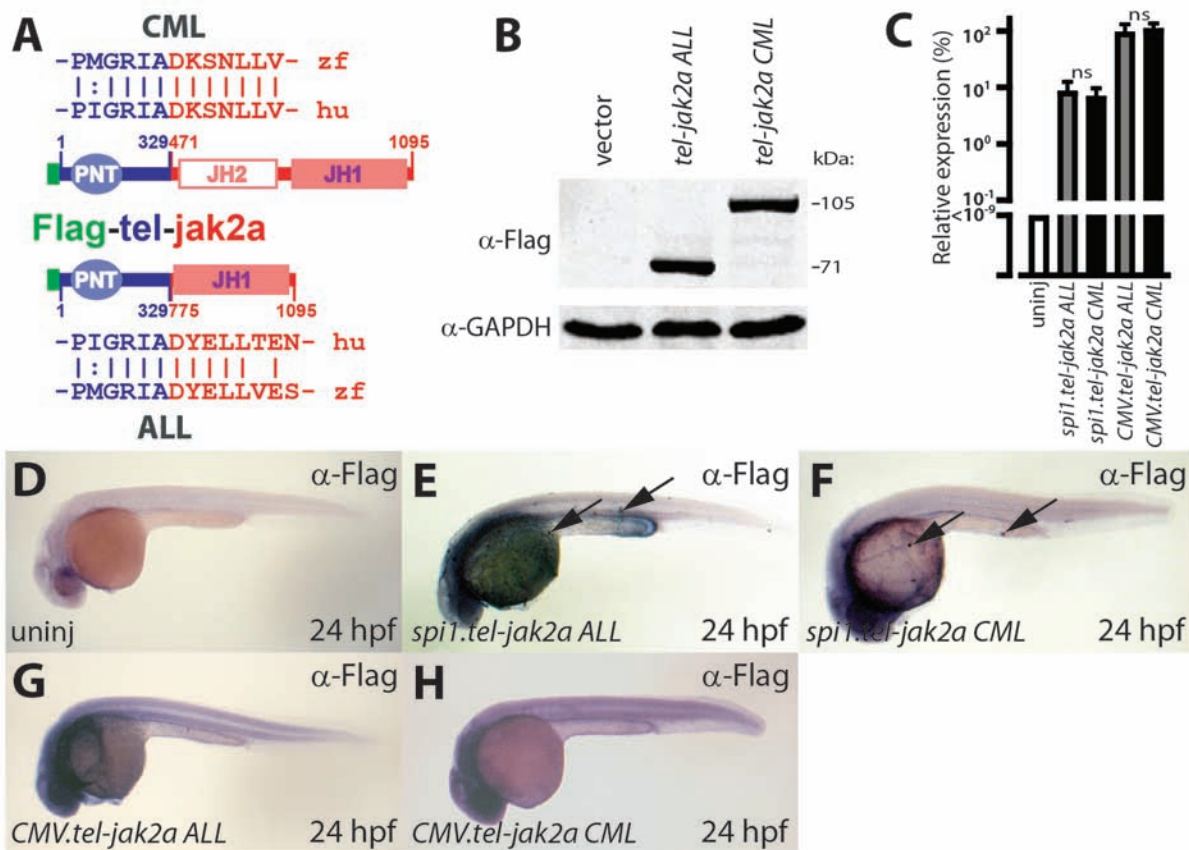

Online Supplementary Figure S1. Construction and expression of *tel-jak2a* fusions.

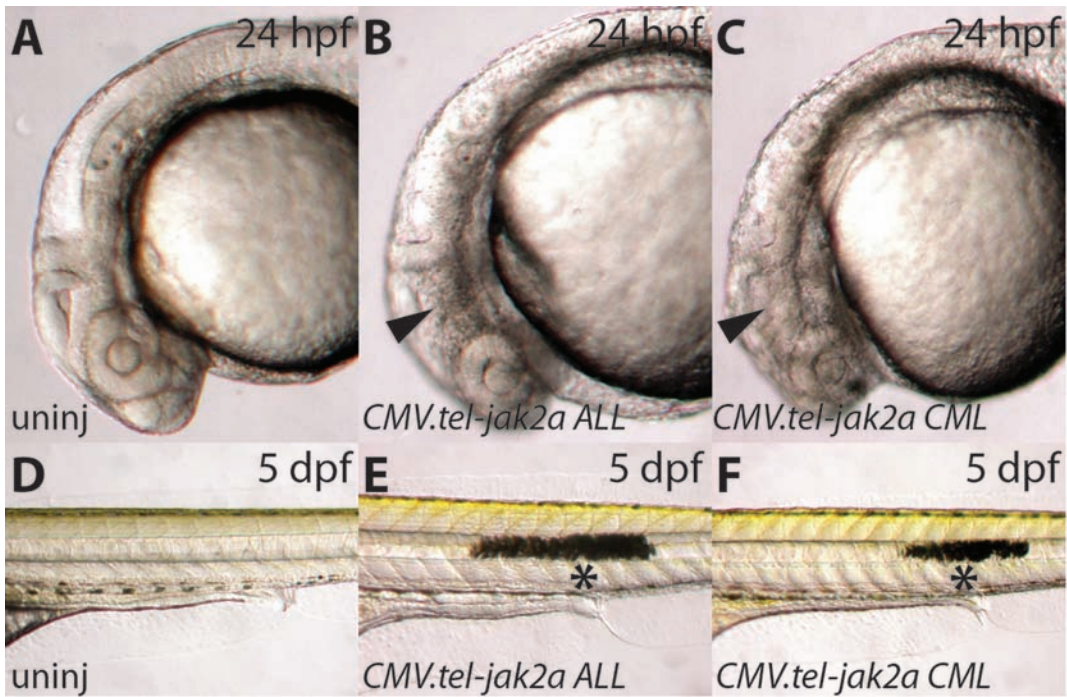

Online Supplementary Figure S2. Non-hematopoietic defects due to ubiquitous expression of *tel-jak2a* fusions.

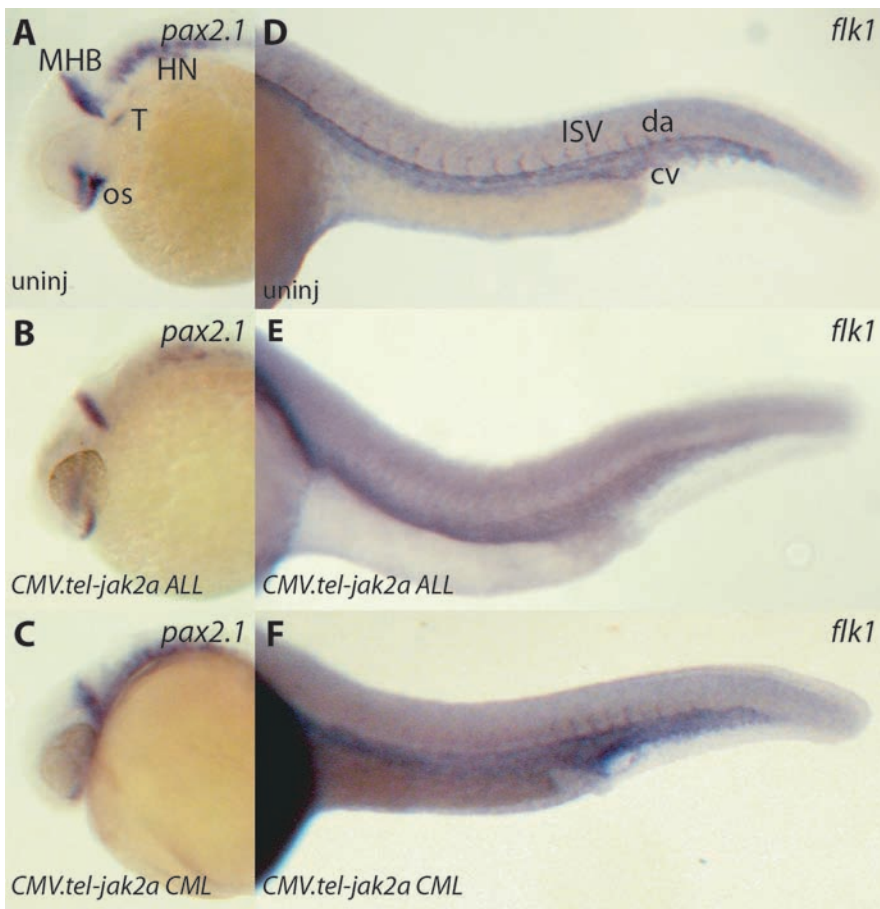

Online Supplementary Figure S3. Non-hematopoietic defects due to ubiquitous expression of *tel-jak2a* fusions.

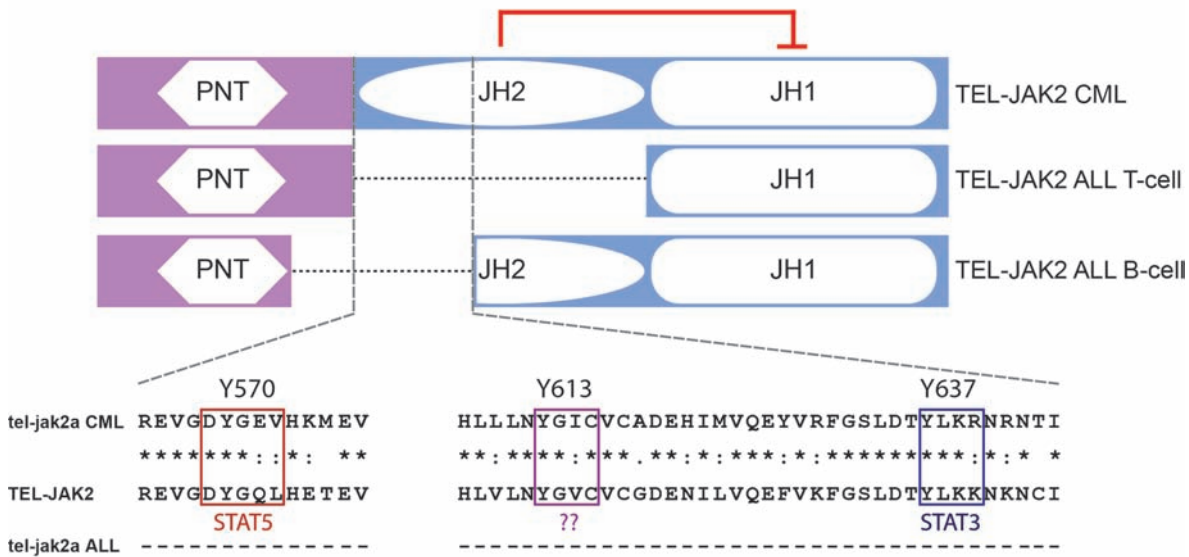

Online Supplementary Figure S4. Proposed mechanism underpinning different responses of alternative TEL-JAK2 fusions.
