# Supplementary material
Source: PubMed Central journal article supplement (PMC3685286)
Supplement: supp_2012.064659_2012_064659-Contributions.pdf [file supp_2012.064659_2012_064659-Contributions.pdf]

**Manuscript no. HAEMATOL/2012/064659 entitled “Alternate TEL-JAK2 fusions associated with T cell acute lymphoblastic leukemia and atypical chronic myelogenous leukemia dissected in zebrafish”**

**Authors: Sara M. N. Onnebo, Parisa Rasighaemi, Janani Kumar, Clifford Liongue & Alister C. Ward**

**Information about the contributions of each person named as having participated in the study**

- 1) **Guarantor(s)**, i.e., person(s) who is (are) responsible for the integrity of the work as a whole:
- Alister C. Ward, School of Medicine, Deakin University, award@deakin.edu.au

According to the International Committee of Medical Journal Editors (ICMJE) ([http://www.icmje.org/ethical\\_1author.html](http://www.icmje.org/ethical_1author.html)): “*Authorship credit should be based on: 1) substantial contributions to conception and design, acquisition of data, or analysis and interpretation of data; 2) drafting the article or revising it critically for important intellectual content; and 3) final approval of the version to be published. Authors should meet conditions 1, 2, and 3 Acquisition of funding, collection of data, or general supervision of the research group alone does not constitute authorship*”.

The guarantors of this manuscript confirm that all persons designated as authors qualify for authorship, and that each author has participated sufficiently in the work to take public responsibility for appropriate portions of the content.

- 2) Authors who participated in the **conception of the study**: Sara Onnebo, Parisa Rasighaemi, Janani Kumar, Clifford Liongue & Alister Ward

3) **Design & Methods**. The following authors were responsible for specific investigations:

- Sara Onnebo & Alister Ward were responsible for the overall experimental design for the data demonstrated in Figures 1-4, and Supplementary Figures 1-3, with additional input from Parisa Rasighaemi and Clifford Liongue
- Parisa Rasighaemi & Alister Ward were responsible for the overall experimental design for the data demonstrated in Figure 5, with additional input from Janani Kumar and Clifford Liongue
- Clifford Liongue & Alister Ward were responsible for the design of Supplementary Figure 5 and Table 1

4) **Results**. The following authors were responsible for specific portions of the results, including figures and tables:

- Sara Onnebo, Parisa Rasighaemi & Alister Ward were responsible for Figure 1
- Sara Onnebo, Parisa Rasighaemi & Alister Ward were responsible for Figure 2
- Sara Onnebo, Parisa Rasighaemi & Alister Ward were responsible for Figure 3
- Sara Onnebo, Parisa Rasighaemi & Alister Ward were responsible for Figure 4
- Sara Onnebo, Parisa Rasighaemi, Janani Kumar, & Alister Ward were responsible for Figure 5
- Clifford Liongue & Alister Ward were responsible for Table 1
- Sara Onnebo, Parisa Rasighaemi, Janani Kumar, & Alister Ward were responsible for Supplementary Figure 1
- Sara Onnebo & Alister Ward were responsible for Supplementary Figure 2
- Sara Onnebo & Alister Ward were responsible for Supplementary Figure 3
- Clifford Liongue & Alister Ward were responsible for Supplementary Figure 4

5) **Writing the manuscript**. The following authors were responsible for writing the manuscript:

- Sara Onnebo & Parisa Rasighaemi were responsible for drafting sections of the manuscript and for final approval
- Janani Kumar & Clifford Liongue provided critical revision of the manuscript and final approval

- Alister Ward drafted large sections of the manuscript, provided critical input and final approval

**6) Contributors Listed in Acknowledgments:**

The authors thank Duncan Shirley and Melanie Condrón for expert technical support, Simon Yoong and Graham Lieschke for helpful discussions at the commencement of this project, as well as Daniel McCulloch, Suzita Mohammed-Noor and Cristal Peck for assistance with manuscript preparation. The authors recognize support from the Sylvania and Charles Viertel Foundation (ACW), NHMRC (ACW), Cancer Council of Victoria (ACW, SMNO), and Deakin University International Research Scholarship Scheme (SMNO, PR, JK). This project utilized the resources of FishWorks: Collaborative Infrastructure for Zebrafish Research, an Australian Research Council LIEF initiative.
